# Supplementary material
Source: MDPI journal article supplement (https://www.mdpi.com/2311-5637/4/4/103)
Supplement: s1 [file s1]

**Table S1. Average molecular sizes of the soluble starch polymers in wort after mashing <sup>1</sup>.**

|                 | Average molecular sizes of soluble starches |                       |
|-----------------|---------------------------------------------|-----------------------|
|                 | $R_h$ : 10- 0.5 nm                          | $R_h$ : 10- 100 nm    |
| Malt 1          | $(1.3 \pm 0.1)^{ab}$                        | $(16.3 \pm 1.4)^{ab}$ |
| Malt 1 + Rice 1 | $(1.3 \pm 0.0)^a$                           | $(17.1 \pm 0.3)^{ab}$ |
| Malt 1 + Rice 2 | $(1.4 \pm 0.0)^{bcd}$                       | $(16.8 \pm 0.0)^{ab}$ |
| Malt 1 + Rice 3 | $(1.3 \pm 0.0)^{ab}$                        | $(15.7 \pm 0.7)^a$    |
| Malt 2          | $(1.4 \pm 0.0)^{bcd}$                       | $(17.2 \pm 1.0)^{ab}$ |
| Malt 2 + Rice 1 | $(1.3 \pm 0.0)^{ab}$                        | $(16.8 \pm 0.5)^{ab}$ |
| Malt 2 + Rice 2 | $(1.3 \pm 0.0)^{abc}$                       | $(16.7 \pm 0.8)^{ab}$ |
| Malt 2 + Rice 3 | $(1.4 \pm 0.0)^{bc}$                        | $(18.4 \pm 1.7)^b$    |
| Malt 3          | $(1.5 \pm 0.0)^e$                           | $(15.8 \pm 1.0)^a$    |
| Malt 3 + Rice 1 | $(1.4 \pm 0.0)^{bcd}$                       | $(15.9 \pm 1.1)^a$    |
| Malt 3 + Rice 2 | $(1.4 \pm 0.0)^{cd}$                        | $(16.8 \pm 0.6)^{ab}$ |
| Malt 3 + Rice 3 | $(1.4 \pm 0.0)^d$                           | $(17.0 \pm 1.1)^{ab}$ |

<sup>1</sup>, Data was based on duplicate measurements. Values with different letters on the same column is significantly different at  $p < 0.05$ .
